RESEARCH ARTICLE

# The role of physical activity in life satisfaction and psychological resilience among college students: Mediating effects of self-efficacy and perceived stress

Rujiang Zhang \*

College of Education and Sports Sciences, Yangtze University, Jingzhou, Hubei, China

\* [13997586406@163.com](mailto:13997586406@163.com)

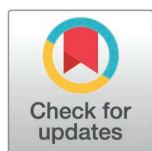

## Abstract

### Background

With the increasing global attention on mental health issues, especially the psychological stress and life satisfaction problems faced by college students, it has become particularly important to explore how physical activity is associated with college students' psychological resilience and quality of life through psychological mechanisms. This study aims to examine the association between physical activity on college students' life satisfaction and psychological resilience, and to investigate the mediating roles of self-efficacy and perceived stress.

### Methods

This study collected data from college students in several universities in China through online questionnaires, using the Body Self-Concept Questionnaire, Life Satisfaction Scale, the Chinese Revised Version of the Connor–Davidson Resilience Scale, General Self-Efficacy Scale, and Perceived Stress Scale to measure each variable. A total of 560 undergraduate students from three universities participated in the survey, reporting on their physical activity, life satisfaction, psychological resilience, self-efficacy, and perceived stress.

### Results

The findings show that physical activity was significantly associated with higher life satisfaction ( $r = 0.439$ ,  $p < 0.001$ ) and psychological resilience ( $r = 0.521$ ,  $p < 0.001$ ). Both self-efficacy (95% CI = [0.138, 0.255] and [0.245, 0.399]) and perceived stress (95% CI = [0.013, 0.070] and [0.040, 0.134]) played significant mediating roles in these processes. Specifically, physical activity was linked to better mental health and

## OPEN ACCESS

**Citation:** Zhang R (2025) The role of physical activity in life satisfaction and psychological resilience among college students: Mediating effects of self-efficacy and perceived stress. PLoS One 20(9): e0331463. <https://doi.org/10.1371/journal.pone.0331463>

**Editor:** Suherman Suherman, Universitas Islam Negeri Raden Intan Lampung, HUNGARY

**Received:** April 24, 2025

**Accepted:** August 16, 2025

**Published:** September 2, 2025

**Copyright:** © 2025 Rujiang Zhang. This is an open access article distributed under the terms of the [Creative Commons Attribution License](https://creativecommons.org/licenses/by/4.0/), which permits unrestricted use, distribution, and reproduction in any medium, provided the original author and source are credited.

**Data availability statement:** The data that support the findings of this study are available from the corresponding author upon request. The raw data are also accessible through figshare: <https://doi.org/10.6084/m9.figshare.29528375>.

**Funding:** The author(s) received no specific funding for this work.

**Competing interests:** The authors have no competing interests to declare that are relevant to the content of this article.

quality of life through its association with higher self-efficacy and lower perceived stress.

## Discussion and implications

This study validates the association between physical activity and improved college students' life satisfaction and psychological resilience and reveals the mediating mechanisms of self-efficacy and perceived stress. These findings provide a scientific basis for designing exercise and psychological intervention programs for college students, with important practical implications.

## 1. Introduction

In today's society, mental health issues have become one of the significant factors impacting people's quality of life, particularly pronounced among college students. College students face various challenges, such as adapting to changing learning environments, coping with academic pressures, establishing interpersonal relationships, and planning future careers [1,2]. These challenges can affect not only their life satisfaction (LS) but also their psychological resilience (PR) adversely [3,4]. Furthermore, the levels of LS and PR can in turn directly influence college students' academic performance, mental health, and the quality of interpersonal relationships [5,6]. The college phase is a critical period for cognitive development, where students' assessments of their life conditions serve as vital indicators of personal well-being [7]. Having good LS and robust PR helps students improve their academic performance and promote holistic health development [8]. Therefore, exploring the factors influencing LS and PR among Chinese college students holds significant research and practical importance.

Previous studies have confirmed that an individual's LS and PR are significantly influenced not only by personality traits, such as neuroticism [9], but also by external social factors (such as academic stress [10]) and behavioral habits (like physical activity (PA) [11]). PA, as a natural therapy requiring no medicinal intervention, offers a safe and effective means to enhance LS and PR among college students. Regular participation in PA naturally elevates their LS and PR without the side effects of medication [7,12]. Such activities stimulate the release of natural chemicals like endorphins, which not only alleviate pain but also enhance pleasure, thus directly boosting mood and LS [13]. Additionally, PA strengthens self-efficacy (SE), enhancing students' confidence and ability to cope with daily stresses and challenges [14]. Furthermore, by improving sleep quality and increasing physical strength, PA further enhances the physiological and PR of college students, laying a solid foundation for their stable performance in academics and personal life [11,15]. Thus, PA is not merely a therapeutic measure, it is also a critical activity for prevention and promoting comprehensive health.

Despite the widely recognized positive effects of PA on mental health, research on its specific mechanisms of action remains relatively scarce. Particularly, the roles

of SE and perceived stress (PS) as potential mediators in the impact of PA on mental health have not been thoroughly investigated. Although existing literature has explored the direct relationship between PA and mental health, or sporadically examined single mediators such as SE or PS, there is a lack of studies that systematically investigate the dual mediating roles of SE and PS in the relationship between PA, LS, and PR among college students. This study innovatively introduces both SE and PS as core mediating variables, aiming to explore their mediating roles in the process linking PA with LS and PR in college students, and to construct and validate a more comprehensive model of these pathways. This research design goes beyond the traditional focus on direct effects or single mediators, aiming to reveal a more complex psychological mechanism chain through which PA affects mental health. This research direction not only deepens our understanding of the psychological benefits of PA—particularly its dual pathways of promoting well-being by enhancing SE and alleviating stress perceptions—but also provides a new perspective and a solid theoretical foundation for designing more targeted and integrated mental health interventions.

The study aims to delve into how PA enhances college students' LS and PR by affecting their SE and PS. By analyzing the mechanisms of these two mediators in detail, this study seeks to reveal the specific pathways through which PA impacts the mental health of college students. Furthermore, by providing empirical support, this study aims to offer a theoretical basis for universities and policymakers to design and implement effective physical intervention measures. We anticipate that these research findings will promote the overall health of college students, helping them achieve higher satisfaction and stronger PR in their academic and personal lives.

## 2. Literature review and research hypotheses

### 2.1. Physical activity and life satisfaction

PA refer to various forms of activities that involve physical movement and skills, aimed at improving physical health and fitness. These can include organized competitive sports, fitness training, yoga, running, and more [16]. LS is a crucial indicator that measures an individual's contentment with their quality of life, encompassing both psychological state and environmental conditions [7,17]. Numerous studies have extensively explored the positive impact of PA on individual LS, finding that college students who regularly engage in physical activities often report higher LS [7,18,19]. For example, a study by Liu, Zhu and Jiang [19] demonstrates a strong positive correlation between regular participation in PA and higher LS among Chinese college students. PA enhances individual life quality directly and indirectly by improving physical health, strengthening social connections, and boosting psychological health [20]. Additionally, physiological changes induced by physical activities, such as the release of endorphins, also contribute to enhanced mental health, thereby increasing LS [13]. According to Self-Determination Theory (SDT), individuals' participation in physical activities can fulfill the three basic psychological needs of autonomy, competence, and relatedness, thereby enhancing their LS [21]. When college students experience improvements in personal ability and social interaction through physical activities, their LS is significantly increased. Based on the above analysis, this study proposes the following hypothesis:

H1: PA significantly positively affects college students' LS.

### 2.2. Physical activity and psychological resilience

PR refers to an individual's capacity to proactively self-regulate and adapt positively to the environment when facing setbacks or adversity, in order to cope with complex and changing challenges [22]. Studies have shown that PA significantly enhances an individual's PR [23,24]. SDT posits that the opportunities for autonomous choice and skill mastery provided by physical activities can enhance the fulfillment of psychological needs, which is the core mechanism of resilience development [21]. In several cross-cultural studies, individuals who regularly engage in PA demonstrate higher stress resistance and better emotional regulation skills [11,15]. For instance, research by Zhao, Zhao, Wang, Zhang and Chen [11] on Chinese college students found that PA significantly and positively enhances their PR. PA provides an effective

stress-release mechanism, not only reducing tension and anxiety through physical activity but also improving mental states by enhancing feelings of achievement and self-control [12]. Additionally, PA strengthens social support networks, which play a crucial role in enhancing PR [25]. Based on the above analysis, this study proposes the following hypothesis:

H2: PA significantly positively affects college students' PR.

### 2.3. The mediating role of self-efficacy

SE refers to an individual's belief in their own abilities to successfully execute actions necessary to achieve specific goals [26]. According to Self-Efficacy Theory (SET), an individual's PR and LS largely depend on their belief in their own abilities and self-regulation skills. PA as a positive mastery experience, not only enhances an individual's SE but also effectively improves their ability to cope with adversity [27,28]. Research indicates that PA enhances LS and PR indirectly by boosting SE. Specifically, engaging in PA has been found to significantly increase SE [14,29], which in turn significantly enhances individuals' LS [30,31]. For example, a study by Wang, Li, Zhang and Luo [14] explored the relationship between PA and SE among college students, finding a significant positive correlation. Research by van Zyl and Dhurup [30] also demonstrated that college students' SE significantly predicted their LS. Further, a study found that by increasing the frequency of weekly exercise, participants' exercise SE was enhanced, which in turn led to an increase in their LS [32]. This improvement is primarily realized through physiological and psychological positive changes brought about by exercise, such as improved cardiovascular health, increased physical strength, and enhanced emotional states [33,34].

According to SET, PA, as a mastery experience, can significantly enhance an individual's SE [35,36]. When individuals make progress in physical fitness and skills through PA, this success experience directly boosts their SE, thereby increasing their confidence in facing other life challenges [14]. This enhanced SE not only enables individuals to cope more actively with stress but also strengthens their PR [37,38]. For example, research by Li, Wang, Yu, Liu, Xu, Lin, et al. [39] on the PR of adolescents showed that PA significantly enhanced individual PR, and SE played a mediating role in the relationship between PA and PR. Based on the above analysis, this study hypothesizes:

H3: SE mediates the relationship between college students' PA and LS.

H4: SE mediates the relationship between college students' PA and PR.

### 2.4. The mediating role of perceived stress

PS refers to an individual's perception and evaluation of stressors in life, encompassing sensitivity to stress, ongoing perception of stress, and subjective interpretation of stress situations [40]. According to SDT, PS reflects an individual's perception of pressure and their coping ability when facing external challenges [21]. PA is often regarded as an effective strategy for alleviating stress. For instance, Zhai, Wu, Koriyama, Wang, Shi, Huang, et al. [41] investigated the relationship between Chinese college students' participation in physical activities and PS, finding that those who regularly engage in PA generally exhibit lower levels of PS. PA as an activity that helps alleviate stress, can indirectly enhance an individual's LS and PR by reducing PS. Therefore, in the relationship between PA and LS, PS plays a key mediating role. Meyer, Grob and Gerber [42] studied the relationship between PA and LS among adolescents, discovering that PA not only enhances LS but also influences it by reducing PS. Additionally, other studies have indicated that regular physical activity can significantly reduce the perception of academic stress, thereby improving LS [43]. Thus, PA indirectly enhances LS by reducing PS, highlighting the importance of PS in psychological regulation [44].

The relationship between PS and PR profoundly affects how individuals cope with daily life stresses and challenges. Research shows that individuals who can effectively manage and reduce PS recover more quickly from major life events and demonstrate greater adaptability and resilience [45]. Lara-Cabrera, Betancort, Muñoz-Rubilar, Rodríguez Novo and De las Cuevas [46] explored the relationship between PS, PR, and mental health among nurses, finding that lower PS can enhance individual PR and promote mental health. In the relationship between PA and PR, PS plays a key mediating role. For example, a study found that college students participating in team sports not only reported lower PS but also

experienced significant improvements in various aspects of PR—including emotional regulation, adversity coping, and resilience [47]. Therefore, reducing PS can be seen as an important mediating path through which PA positively influences PR, emphasizing the significance of physical activities in promoting mental health and adaptability. Based on the above analysis, this study hypothesizes:

H5: PS mediates the relationship between college students' PA and LS.

H6: PS mediates the relationship between college students' PA and PR.

Based on the above assumption, the research framework is illustrated in Fig 1.

### 3. Materials and methods

#### 3.1. Participants

From December 2024 to February 2025, this study collected data through the online questionnaire platform Questionnaire Star ([www.Sojump.com](http://www.Sojump.com)) by randomly selecting participants from multiple universities in China. Initially, we established preliminary communication with the school administration and coordinated with counselors, who introduced the purpose and significance of the survey to students during class meetings. Next, participants were randomly selected from the student lists of each class using computer-generated random numbers, ensuring the randomness and representativeness of the sample. After the participants were selected, counselors shared the survey link in the class group and emphasized the voluntary nature of participation and privacy protection measures. This approach respected students' willingness while ensuring the quality and reliability of the data, providing a solid foundation for subsequent analysis. This study was approved by the Ethics Committee of Yangtze University (Approval Number: No. 2024-010-014). All participants provided informed consent prior to the survey. For participants under the age of 18, written consent was obtained from their guardians.

According to Kline [48], the sample size should have at least 10 respondents per survey item. The questionnaire in this study included 59 items. Considering an approximate 20% sample attrition rate, the required sample size was determined to be 708 participants ( $102 \text{ items} \times 10 \text{ respondents} + 20\% \times 102 \text{ items} \times 10 \text{ respondents}$ ). To meet the research requirements, 720 questionnaires were distributed, and 710 were eventually returned [49]. During the data cleaning process, 150 questionnaires were discarded for the following reasons: more than 20% of the questions were left unanswered, or more than 80% of the questions were answered with extreme options (completely agree or completely disagree). These response patterns could lead to significant bias, known as floor or ceiling effects, which would affect the accuracy of the data analysis. Therefore, the study analyzed data from 560 valid questionnaires.

The specific demographic data is shown in Table 1: 140 males (25.0%) and 420 females (75.0%); the majority of participants were between 19 and 22 years old, with 518 participants (92.5%); the largest proportion was second-year students,

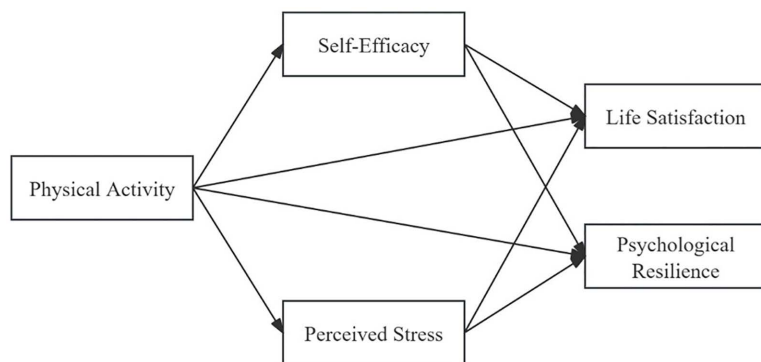

**Fig 1. Research framework.**

<https://doi.org/10.1371/journal.pone.0331463.g001>



**Table 1. Demographic characteristics of participants.**

| Variable           | N   | Percentage (%) | LS <i>p</i> -value | PR <i>p</i> -value |
|--------------------|-----|----------------|--------------------|--------------------|
| Gender             |     |                | < 0.001            | < 0.001            |
| Male               | 140 | 25.0           |                    |                    |
| Female             | 420 | 75.0           |                    |                    |
| Grade              |     |                | < 0.001            | < 0.001            |
| Freshman           | 216 | 28.6           |                    |                    |
| Sophomore          | 290 | 51.8           |                    |                    |
| Junior             | 52  | 9.3            |                    |                    |
| Senior             | 2   | 0.4            |                    |                    |
| Age                |     |                | 0.292              | 0.193              |
| Under 18 years old | 36  | 6.4            |                    |                    |
| 19-22 years old    | 518 | 92.5           |                    |                    |
| Over 22 years old  | 6   | 1.1            |                    |                    |

<https://doi.org/10.1371/journal.pone.0331463.t001>

with 290 participants (51.8%). There were significant differences in LS and PR based on gender ( $p < 0.001$ ) and grade level ( $p < 0.001$ ). This representative sample provides a solid foundation for analyzing the current status of college students' LS and PR. The diversity and scale of the sample contribute to ensuring the generalizability of the study's findings to a broader college student population within this research context. All participants voluntarily participated in the study and signed a written informed consent form. The research process adhered to the ethical principles of the Declaration of Helsinki.

## 3.2. Measurement instruments

**3.2.1. Physical activity scale.** The PA scale in this study is derived from the Physical Self-Description Questionnaire (PSDQ) developed by Marsh, Richards, Johnson, Roche and Tremayne [50], specifically from the PA dimension. This dimension consists of six items, two of which require reverse scoring. The scale is typically rated on a 5-point scale, ranging from 1 (strongly disagree) to 5 (strongly agree). Higher scores indicate a higher level of PA among university students. In this study, the Cronbach's  $\alpha$  for the scale is 0.879.

**3.2.2. Life satisfaction scale.** The LS scale used in this study is the Satisfaction with Life Scale developed by Diener, Emmons, Larsen and Griffin [51], which assesses university students' overall LS. This scale contains five items and utilizes a 7-point Likert scale, ranging from 1 (strongly disagree) to 7 (strongly agree). Higher scores reflect a higher level of LS. The scale has been validated among Chinese university students and has shown good reliability and validity [35]. In this study, the Cronbach's  $\alpha$  for the scale is 0.876.

**3.2.3. Psychological Resilience Scale.** The Chinese revised version of the Connor-Davidson Resilience Scale (CD-RISC), developed by Yu and Zhang [52], is used to assess university students' PR. The scale consists of three dimensions—toughness, self-reliance, and optimism—and contains 25 items in total. Each item is rated on a 5-point scale, ranging from 1 (strongly disagree) to 5 (strongly agree). Higher scores indicate stronger PR. The scale has been validated in Chinese university student populations and has demonstrated good reliability and validity [53]. In this study, the Cronbach's  $\alpha$  for the scale is 0.976.

**3.2.4. General self-efficacy scale.** The General Self-Efficacy Scale [54] is used to measure university students' SE in this study. The scale includes 10 items, each rated on a 5-point scale ranging from 1 (strongly disagree) to 5 (strongly agree). The total score is the sum of the individual item scores, ranging from 10 to 50. A higher total score indicates stronger general SE. This scale has been validated among Chinese university students and has shown good reliability and validity [55]. In this study, the Cronbach's  $\alpha$  for the scale is 0.948.

**3.2.5. Perceived stress scale.** The Perceived Stress Scale (PSS) developed by Cohen, Kamarck and Mermelstein [40] is used to measure participants' PS levels. The scale consists of 10 items, each rated on a 5-point scale, ranging from 1 (strongly disagree) to 5 (strongly agree). The total score is the sum of the individual item scores, ranging from 10 to 50. Higher scores indicate higher PS levels. The scale has been validated among Chinese university students and has demonstrated good reliability and validity [56]. In this study, the Cronbach's  $\alpha$  for the scale is 0.872.

### 3.3. Statistical analysis

This study conducted data analysis using SPSS 22.0. To test the correlations between variables (H1 and H2), descriptive statistics and Pearson product-moment correlation analysis were employed. To examine the mediating roles of SE and PS (H3 to H6), Model 4 within the PROCESS macro in SPSS 22.0 was utilized. The study performed bootstrapping with 5000 samples to determine the mediation effects. If the bias-corrected Bootstrap 95% confidence interval (CI) does not include zero, it indicates a significant mediating effect at the  $\alpha = 0.05$  level.

## 4. Results

### 4.1. Test for common method bias

This study employed Harman's single-factor test to assess Common Method Bias (CMB). The test revealed that no single factor accounted for a majority of the variance [57]. The largest single factor identified explained only 43.631% of the variance, significantly below the critical threshold of 50% [58]. Therefore, it can be concluded that common method bias does not significantly impact the results of this study.

### 4.2. Correlation analysis

The study conducted a correlation analysis on the total scores of PA, LS, PR, SE and PS. As shown in Table 2, Pearson product-moment correlation analysis indicated significant positive correlations between PA and LS, PR, and SE ( $p < 0.001$ ). There was a significant negative correlation between PA and the total score of PS ( $p < 0.001$ ). Thus, H1 and H2 are supported by these findings.

### 4.3. Analysis of mediating effects

**4.3.1. The mediating role of self-efficacy.** In H3 and H4, this study predicted that SE mediates the relationship between PA and both LS and PR. Consequently, Model 4 of the PROCESS macro was used to analyze data from 560 participants. After adjusting for gender, grade level, and age, the results of the regression analysis are shown in Table 3 and Fig 2, PA significantly predicted SE ( $\beta = 0.398$ ,  $p < 0.001$ ), LS ( $\beta = 0.218$ ,  $p < 0.001$ ), and PR ( $\beta = 0.179$ ,  $p < 0.001$ ) among college students. SE significantly predicted LS ( $\beta = 0.489$ ,  $p < 0.001$ ) and PR ( $\beta = 0.805$ ,  $p < 0.001$ ). Therefore, the

**Table 2. Means, standard deviations, and correlation analysis of variables ( $r$ ).**

| Variable | M $\pm$ SD        | PA        | LS        | PR        | SE        | PS |
|----------|-------------------|-----------|-----------|-----------|-----------|----|
| PA       | 22.82 $\pm$ 4.12  | 1         |           |           |           |    |
| LS       | 24.41 $\pm$ 6.39  | 0.439***  | 1         |           |           |    |
| PR       | 95.43 $\pm$ 17.54 | 0.521***  | 0.678***  | 1         |           |    |
| SE       | 37.22 $\pm$ 7.28  | 0.433***  | 0.590***  | 0.877***  | 1         |    |
| PS       | 25.92 $\pm$ 6.97  | -0.255*** | -0.289*** | -0.533*** | -0.606*** | 1  |

Note: N = 560. PA, physical activity; LS, life satisfaction; PR, psychological resilience; SE, self-efficacy; PS, perceived stress; \*\*\* $p < 0.001$ .

<https://doi.org/10.1371/journal.pone.0331463.t002>

**Table 3. Mediating effect of self-efficacy.**

| Outcome Variable | Predictor Variable | $\beta$  | SE    | T      | Bootstrap 95% CI |           | $R^2$ | F       |
|------------------|--------------------|----------|-------|--------|------------------|-----------|-------|---------|
|                  |                    |          |       |        | Boot LLCI        | Boot ULCI |       |         |
| SE               | PA                 | 0.398*** | 0.041 | 9.758  | 0.318            | 0.478     | 0.210 | 36.779  |
| LS               | PA                 | 0.218*** | 0.039 | 5.641  | 0.143            | 0.295     | 0.392 | 71.316  |
|                  | SE                 | 0.489*** | 0.037 | 13.115 | 0.416            | 0.562     |       |         |
| PR               | PA                 | 0.179*** | 0.022 | 7.982  | 0.135            | 0.223     | 0.797 | 435.211 |
|                  | SE                 | 0.805*** | 0.022 | 37.373 | 0.762            | 0.847     |       |         |

Note: PA, physical activity; LS, life satisfaction; PR, psychological resilience; SE, self-efficacy; PS, perceived stress; \*\*\* $p < 0.001$ .

<https://doi.org/10.1371/journal.pone.0331463.t003>

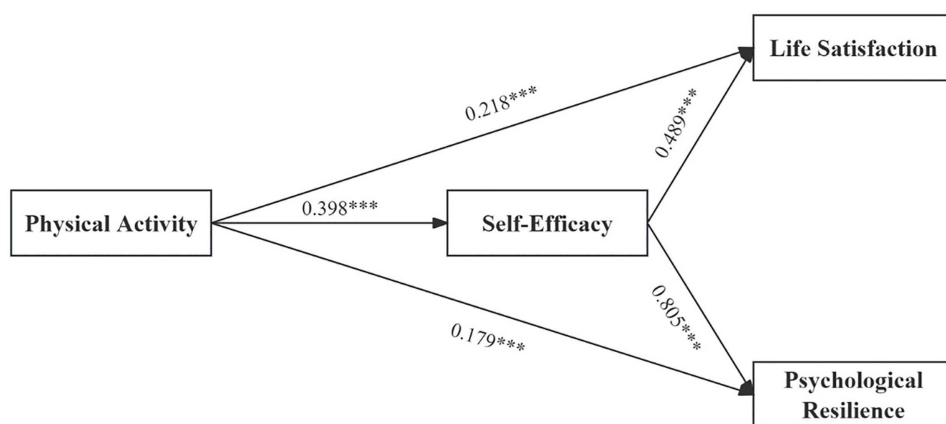

**Fig 2. Results of the mediating effect model for self-efficacy.**

<https://doi.org/10.1371/journal.pone.0331463.g002>

indirect effects of PA on LS and PR through SE were significant, with indirect effects of 0.195 and 0.320, respectively, and 95% CI of [0.138, 0.255] and [0.245, 0.399]. Thus, H3 and H4 are supported.

**4.3.2. The mediating role of perceived stress.** In H5 and H6, this study predicted that PS mediates the relationship between PA and both LS and PR. Accordingly, Model 4 of the PROCESS macro was used to analyze data from 560 participants. After adjusting for gender, grade level, and age, the results of the regression analysis are shown in [Table 4](#) and [Fig 3](#), PA significantly negatively predicted PS ( $\beta = -0.191$ ,  $p < 0.001$ ) and significantly positively predicted LS ( $\beta = 0.376$ ,  $p < 0.001$ ) and PR ( $\beta = 0.418$ ,  $p < 0.001$ ). PS significantly negatively predicted LS ( $\beta = -0.196$ ,  $p < 0.001$ ) and PR ( $\beta = -0.441$ ,  $p < 0.001$ ). Therefore, the indirect effects of PA on LS and PR through PS were significant, with indirect effects of 0.037 and 0.084, respectively, and 95% CI of [0.013, 0.070] and [0.040, 0.134]. Thus, H5 and H6 are supported.

## 5. Discussion

This study aimed to thoroughly explore the comprehensive impacts of PA on LS and PR among college students, along with the mediating roles of SE and PS. Through a comprehensive review of existing literature, this study hypothesized that PA plays a significant role in enhancing LS and PR in college students, and that SE and PS significantly mediate these relationships. The findings supported these hypotheses, showing that PA significantly improved LS and PR among college students. Additionally, the SE and PS respectively mediated the relationships between PA and both LS and PR. More importantly, this study clearly delineates the complex mechanisms through which PA promotes positive psychological



**Table 4. Mediating effect of perceived stress.**

| Outcome Variable | Predictor Variable | $\beta$   | SE    | T      | Bootstrap 95% CI |           | $R^2$ | F      |
|------------------|--------------------|-----------|-------|--------|------------------|-----------|-------|--------|
|                  |                    |           |       |        | Boot LLCI        | Boot ULCI |       |        |
| PS               | PA                 | -0.191*** | 0.044 | -4.344 | -0.278           | -0.105    | 0.081 | 12.178 |
| LS               | PA                 | 0.376***  | 0.041 | 9.222  | 0.296            | 0.456     | 0.238 | 34.575 |
|                  | PS                 | -0.196*** | 0.039 | -5.053 | -0.271           | -0.120    |       |        |
| PR               | PA                 | 0.418***  | 0.034 | 12.132 | 0.348            | 0.482     | 0.464 | 95.941 |
|                  | PS                 | -0.441*** | 0.032 | 13.587 | -0.505           | -0.377    |       |        |

Note: PA, physical activity; LS, life satisfaction; PR, psychological resilience; SE, self-efficacy; PS, perceived stress; \*\*\* $p < 0.001$ .

<https://doi.org/10.1371/journal.pone.0331463.t004>

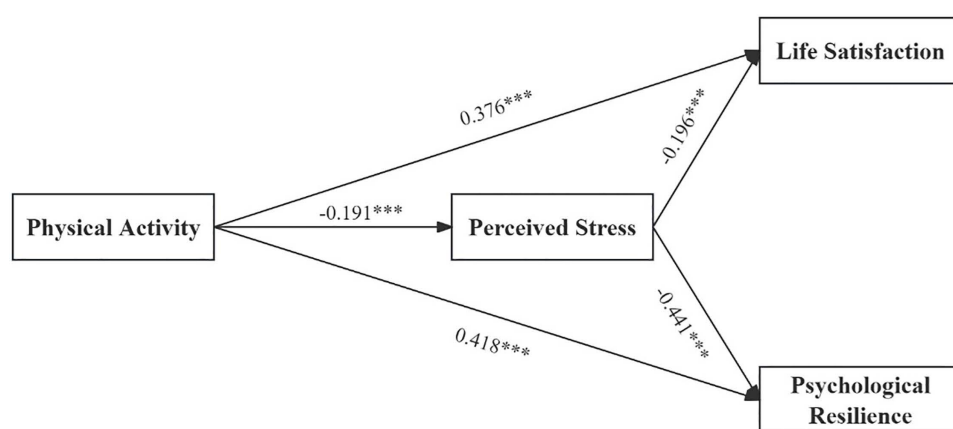

**Fig 3. Results of the mediating effect model for perceived stress.**

<https://doi.org/10.1371/journal.pone.0331463.g003>

outcomes (LS and PR) in college students by examining two key mediating variables simultaneously. Specifically, it highlights how PA enhances SE and reduces PS through two parallel and interconnected pathways. This significantly advances previous research that primarily focused on direct effects or single mediators. The following section will discuss these findings in detail and explore their implications for deepening theoretical understanding and guiding practical applications.

### 5.1. Impact of physical activity on life satisfaction

PA has a significant positive impact on LS among college students, a finding consistent with the study by Liu, Zhu and Jiang [19], which found that appropriate PA significantly predicts higher LS in college students. Participation in PA provides opportunities for increased social interaction, fostering the formation of friendships and expansion of social support networks. Good social relationships enhance individuals' sense of belonging and well-being, thereby improving LS [59]. According to SDT [21], the fulfillment of basic psychological needs such as relatedness, competence, and autonomy, which are often nurtured through physical activity, plays a crucial role in promoting well-being and LS [60]. When students engage in PA, they experience a sense of accomplishment and competence (especially in activities like team sports or improving personal fitness levels), which directly contributes to their sense of LS. Additionally, participating in team sports can cultivate team spirit and cooperative skills, which not only enhance individuals' social skills but also bring positive psychological effects, further increasing LS [61]. Moreover, PA helps regulate emotions, reduce symptoms of depression

and anxiety, and increase the frequency of positive emotions. A good emotional state is an important component of high LS [62]. This research finding further validates and strengthens the evidence supporting the direct positive effect of PA on LS, providing new support for this core relationship.

## 5.2. Impact of physical activity on psychological resilience

PA has a significant positive impact on the PR of college students, aligning with the findings of Zhao, Zhao, Wang, Zhang and Chen [11], who observed that college students who regularly engage in PA demonstrate higher emotional regulation capabilities and PR. PA improves physical health and enhances fitness, providing students with a solid physiological foundation when facing life's challenges. SET emphasizes that physical fitness provides "physiological evidence" that supports the belief in one's ability to cope with challenges. From a process-oriented perspective in resilience theory, resilience develops as individuals overcome the negative impacts of exposure to harmful and traumatic events, which results from the interaction between individuals and their environment [63]. Physical activity is often associated with challenges, self-improvement, and goal achievement. During exercise, individuals are required to socialize and continuously adapt to their surroundings, helping them acquire the skills and abilities to better navigate difficulties and challenges [64]. Furthermore, regular physical activity helps balance hormonal levels, such as reducing the secretion of stress hormones (cortisol) and increasing the production of happiness hormones (endorphins), thereby enhancing PR [12,13]. PA also serves as an effective emotional regulation tool, helping to reduce emotional fluctuations and manage negative emotions, thus enabling students to maintain mental toughness when facing academic and life challenges [65]. This research finding further consolidates the theoretical foundation of PA as a direct driving factor for enhancing PR in college students.

## 5.3. The mediating role of self-efficacy

SE plays a partial mediating role between PA and LS among college students. This finding aligns with the research by Tian, Zhou, Qiu and Zou [32], which observed that college students who participate in PA exhibit higher SE, further enhancing their LS. When college students achieve specific goals through PA, such as running longer distances, lifting heavier weights, or improving sports performance, they not only develop a belief in their capabilities within the realm of sports but also in other areas of life. According to SET [26], achieving success in specific activities strengthens an individual's belief in their own competence. This belief in one's capabilities is not limited to the context of physical activity but extends to other life domains, thereby increasing LS [33]. Therefore, the increase in SE due to PA provides a psychological foundation for enhancing students' overall LS, as they feel more capable of managing challenges and achieving goals in various areas of life. The enhanced sense of SE also fosters a greater sense of control, which is essential for psychological well-being [34]. By incorporating SE as a mediating variable into a more comprehensive model, this study not only confirms the unique mediating role of SE in the "PA → LS" pathway, but also provides new and more systematic evidence for understanding how PA enhances LS by strengthening individuals' efficacy beliefs.

SE also partially mediates the relationship between PA and PR in college students. This is consistent with the findings of Li, Wang, Yu, Liu, Xu, Lin, et al. [39], which showed that appropriate PA significantly enhances the PR of college students, with SE significantly mediating this relationship. Small victories in PA, such as completing a challenging training session or achieving a new personal record, provide students with direct experiences of success. These achievements reinforce their SE, the belief in their capacity to reach goals [61]. Enhanced SE gives students greater confidence when facing challenges and difficulties, fostering a belief in their ability to overcome these obstacles. This belief is central to PR, as it motivates individuals to persist and seek solutions in adversity. SE also helps individuals more effectively manage and regulate their emotions [66], enabling them to maintain a more stable and positive mindset when confronted with stress and adversity. This study clearly identifies and validates the contribution of SE as a mediating variable in the model exploring the relationship between PA and PR. This finding deepens our understanding of how PA builds PR by fostering the belief of "I can do it," providing more focused theoretical support for intervention strategies aimed at enhancing SE.

#### 5.4. The mediating role of perceived stress

PS partially mediates the relationship between PA and LS among college students. This finding is consistent with the research by Meyer, Grob and Gerber [42], which indicated that PA can reduce college students' perception of stress, thereby increasing their LS. Continuous high levels of stress not only affect an individual's mental health and quality of life but can also lead to emotional issues and physical symptoms. Regular PA helps improve emotional stability and reduce emotional fluctuations among college students. SDT further explains that autonomous exercise (such as voluntary fitness activities) reduces the "sense of control" and decreases the perception of threat in stress evaluations. The enhanced SE and improved physical sensations from exercise can increase individuals' sense of control and satisfaction, effectively reducing their perception of stress [41]. Stress-Coping Theory explains this finding by suggesting that engaging in physical activity helps reduce physiological stress responses, which enables individuals to better manage daily stressors [67]. Lower stress levels facilitate better decision-making and promote a positive outlook on life, which, in turn, improves LS [61]. Furthermore, the reduction in PS enables college students to make more rational and effective decisions in their academic and personal lives, thus enhancing their overall satisfaction with life [43]. This research finding clearly confirms that PA enhances LS through an independent pathway by effectively alleviating the stress levels experienced by individuals. It highlights the key mechanism of stress management in enhancing subjective well-being and provides more direct empirical evidence for designing interventions that focus on improving LS through exercise-based stress reduction.

PS also partially mediates the relationship between PA and PR among college students. This supports the conclusions by Lines, Ducker, Ntoumanis, Thøgersen-Ntoumani, Fletcher and Gucciardi [47], who found that college students actively involved in team sports exhibited lower levels of PS and enhanced their PR through this pathway. PA activates the body's physiological response systems, prompting the brain to release natural chemicals like endorphins, which alleviate pain and enhance feelings of pleasure. Additionally, PA helps reduce the levels of stress hormones (such as cortisol) in the body, thereby reducing feelings of stress [12,13]. SDT posits that cooperation in team sports satisfies the "relatedness need," which can reduce feelings of loneliness and further decrease PS. When college students engage in team sports through PA, it effectively reduces their PS, they often find themselves better equipped to handle life's challenges. This experiential learning enhances their coping strategies and increases their resilience in stressful situations [46]. Moreover, consistent PA and sustained stress reduction help individuals develop a more positive outlook on life and worldview [68]. This positive mindset is helpful in maintaining optimism when facing difficulties, further enhancing PR. This result clearly reveals that the reduction of PS is an important mechanism through which PA enhances PR in college students. It significantly deepens our understanding of how PA acts as a "stress buffer" to strengthen individuals' ability to cope with adversity, providing a more reliable foundation for developing programs aimed at lowering PS through exercise interventions to enhance resilience.

## 6. Implications and limitations

### 6.1. Implications

This study delved into the comprehensive effects of PA on LS and PR among college students, examining in detail the mediating roles of SE and PS. This research not only confirmed the positive impact of PA on mental health but also highlighted the critical roles of SE and PS in promoting mental health processes. Theoretically, this study expands the discussion on LS and PR, emphasizing the potential of PA as an effective intervention tool, and further enriches the research content of positive psychology and sports psychology. By exploring the mediating roles of SE and PS, this study offers new perspectives on how PA can specifically improve mental health. These findings provide a theoretical basis for universities to design and implement interventions aimed at enhancing students' mental health and LS, and they underscore the importance and necessity of promoting PA among student populations.

Based on the core finding of this study that PA significantly enhances college students' LS and PR, this paper provides specific practical recommendations for policymakers, universities, and students. Firstly, education policymakers should

place greater emphasis on the vital role of PA in promoting college students' physical and mental health, considering it a core strategy for improving overall student well-being. Policies should encourage and support investments in sports facilities and diversified physical activities (such as physical education courses, campus sports events, and social sports activities) to facilitate broader student participation in PA. Additionally, preferential policies can be implemented to encourage universities to offer personalized physical activity options tailored to different interests and needs, thereby increasing student engagement and motivation for exercise. Secondly, university administrators should fully recognize that PA not only contributes to students' physical health but also indirectly enhances their LS and PR through mechanisms such as boosting SE and alleviating stress. Therefore, universities should actively invest in sports facilities, offer regular PA courses, organize diverse physical activities, and provide students with multi-layered participation opportunities by combining academic and extracurricular activities. Universities can also enhance students' teamwork spirit and social skills by organizing sports competitions, team activities, and other events, which will further improve students' mental health. Lastly, individual students should recognize that regular participation in PA is not only beneficial to their physical health but also significantly improves their LS and PR. Therefore, students should proactively choose physical activities that suit their interests and set clear exercise goals. By continuously achieving these goals, students can enhance their SE and stress management skills. Through participation in physical activities, students can not only relieve academic pressure but also strengthen their PR, enabling them to better cope with challenges in both their academic and personal lives, thus promoting the overall development of their physical and mental health.

## 6.2. Limitations and future research directions

While this study has advanced our understanding of the relationships among university students' PA, LS, PR, SE, and PS, it also has several limitations. Firstly, this study utilized a cross-sectional design, collecting data at a single point in time, which does not establish causality. Although associations between PA and both LS and PR were found, it is unclear if PA directly leads to improvements in these psychological states. Future research could employ a longitudinal design, tracking the same subjects over different time points to explore the causal relationships between PA and both LS and PR. Secondly, this study primarily relies on self-reported data to assess the variables. Self-report data may be influenced by recall bias and social desirability effects, which limit the objectivity and accuracy of the data. Future research could improve the objectivity and reliability of the data by integrating multiple data collection methods, such as fitness tests and anthropometric measurements. Furthermore, the findings of this study provide valuable insights into the impact of PA on LS and PR among college students, but their generalizability may be limited. Cultural differences, educational disparities, and socio-economic factors across regions could affect how physical education influences students' well-being. In some cultures, PA may be more emphasized, while others may face challenges such as limited resources or negative societal attitudes toward physical activity. Future research should explore cross-cultural differences and consider socio-economic and institutional factors to better understand how PA programs affect student well-being in diverse contexts. Finally, although this study considered the mediating roles of SE and PS, it was unable to fully control for other potential variables that may influence the results, such as personality traits (e.g., extraversion, neuroticism), family upbringing, peer support, family background, socioeconomic status, and academic pressure. Therefore, future research should take into account and control for additional variables that may affect the outcomes, such as family environment, social support, economic conditions, and academic stress, in order to improve the accuracy of the research conclusions.

## 7. Conclusion

This study found that PA was significantly positively associated with college students' LS and PR. Furthermore, SE and PS played significant mediating roles in the relationship between PA and both LS and PR. Theoretically, this study enriches the model of the relationship between PA, LS, and PR, providing new perspectives for understanding the mechanisms through which PA is associated with college students' mental health (i.e., via SE- and PS-related mediating

pathways). Practically, this study offers theoretical support for the development of mental health intervention strategies for college students, particularly in leveraging the associations with enhanced SE and reduced PS. The limitations of this study include the use of a cross-sectional design, which limits causal inference; the narrow sample scope, which may affect the generalizability of the results; and the potential for subjective bias due to the use of self-report questionnaires. Future research could adopt a longitudinal design, expand the sample size, and combine multiple data sources to further validate and extend the model proposed in this study.

## Acknowledgments

We would like to sincerely thank all the students who participated in the survey and the teachers who assisted in distributing the questionnaires for their valuable contributions to this research.

## Author contributions

**Conceptualization:** Rujiang Zhang.

**Formal analysis:** Rujiang Zhang.

**Investigation:** Rujiang Zhang.

**Methodology:** Rujiang Zhang.

**Supervision:** Rujiang Zhang.

**Writing – original draft:** Rujiang Zhang.

**Writing – review & editing:** Rujiang Zhang.

## References

1. Wang Y, Zhang S, Liu X, Shi H, Deng X. Differences in central symptoms of anxiety and depression between college students with different academic performance: a network analysis. *Front Psychol.* 2023;14:1071936. <https://doi.org/10.3389/fpsyg.2023.1071936> PMID: 36925600
2. Peng Y, Lv SB, Low SR, Bono SA. The impact of employment stress on college students: psychological well-being during COVID-19 pandemic in China. *Curr Psychol.* 2023;1–12. <https://doi.org/10.1007/s12144-023-04785-w> PMID: 37359658
3. Smith GD, Lam L, Poon S, Griffiths S, Cross WM, Rahman MA, et al. The impact of COVID-19 on stress and resilience in undergraduate nursing students: a scoping review. *Nurse Educ Pract.* 2023;72:103785. <https://doi.org/10.1016/j.nepr.2023.103785> PMID: 37832371
4. Lettau J. The impact of children's academic competencies and school grades on their life satisfaction: what really matters? *Child Ind Res.* 2021;14(6):2171–95. <https://doi.org/10.1007/s12187-021-09830-3>
5. Liu S, Song M, Teng H. Postgraduates' time management disposition and mental health: mediating role of life satisfaction and moderating role of core self-evaluations. *BMC Psychol.* 2023;11(1):316. <https://doi.org/10.1186/s40359-023-01349-2> PMID: 37803401
6. Xu Y, Zheng Q-X, Jiang X-M, Guo S-B, Kang Y-L, Lin Y-P, et al. Effects of coping on nurses' mental health during the COVID-19 pandemic: mediating role of social support and psychological resilience. *Nurs Open.* 2023;10(7):4619–29. <https://doi.org/10.1002/nop2.1709> PMID: 36947673
7. Zhou G-Y, Yang B, Li H, Feng Q-S, Chen W-Y. The influence of physical exercise on college students' life satisfaction: The chain mediating role of self-control and psychological distress. *Front Psychol.* 2023;14:1071615. <https://doi.org/10.3389/fpsyg.2023.1071615> PMID: 36760450
8. Meng Q, Jia W. Influence of psychological hardness on academic achievement of university students: The mediating effect of academic engagement. *Work.* 2023;74(4):1515–25. <https://doi.org/10.3233/WOR-211358> PMID: 36565087
9. Tang Q, He X, Zhang L, Liu X, Tao Y, Liu G. Effects of neuroticism on differences in symptom structure of life satisfaction and depression-anxiety among college students: a network analysis. *Behav Sci (Basel).* 2023;13(8):641. <https://doi.org/10.3390/bs13080641> PMID: 37622781
10. Karaman MA, Nelson KM, Cavazos Vela J. The mediation effects of achievement motivation and locus of control between academic stress and life satisfaction in undergraduate students. *Br J Guid Counsell.* 2017;46(4):375–84. <https://doi.org/10.1080/03069885.2017.1346233>
11. Zhao Z, Zhao S, Wang Q, Zhang Y, Chen C. Effects of physical exercise on mobile phone addiction in college students: the chain mediation effect of psychological resilience and perceived stress. *Int J Environ Res Public Health.* 2022;19(23):15679. <https://doi.org/10.3390/ijerph192315679> PMID: 36497752
12. Li Y. College students' physical and mental health exercise based on tennis. *Rev Bras Med Esporte.* 2021;27(spe):14–6. [https://doi.org/10.1590/1517-8692202127012020\\_0110](https://doi.org/10.1590/1517-8692202127012020_0110)



13. Huang YQ, Guo CF, Ouyang RY, Wang H, Liu DF. Analysis and Countermeasures of related factors of mental health and physical exercise of College Students. *Revista De Psicologia Del Deporte*. 2022;31(2):1–8.
14. Wang K, Li Y, Zhang T, Luo J. The Relationship among College Students' Physical Exercise, Self-Efficacy, Emotional Intelligence, and Subjective Well-Being. *Int J Environ Res Public Health*. 2022;19(18):11596. <https://doi.org/10.3390/ijerph191811596> PMID: 36141869
15. Fathyl KA, Jasim MAA, Jawad HH, Aljuboory DS, Majidi A, Rashed YA, et al. Moderating effect of physical exercise between the relation of psychological resilience and negative emotions of university students in Iraq. *Revista de Psicologia del Deporte*. 2022;31(2):142–52.
16. Morgan WP, Ellickson KA. Health, anxiety, and physical exercise. *Anxiety in Sports*. Taylor & Francis; 2021. pp. 165–82.
17. Shin DC, Johnson DM. Avowed happiness as an overall assessment of the quality of life. *Soc Indic Res*. 1978;5(1–4):475–92. <https://doi.org/10.1007/bf00352944>
18. Zhang Y, Ren M, Zou S. Effect of physical exercise on college students' life satisfaction: mediating role of competence and relatedness needs. *Front Psychol*. 2022;13:930253. <https://doi.org/10.3389/fpsyg.2022.930253> PMID: 35967665
19. Liu F, Zhu Z, Jiang B. The Influence of Chinese college students' physical exercise on life satisfaction: the chain mediation effect of core self-evaluation and positive Emotion. *Front Psychol*. 2021;12:763046. <https://doi.org/10.3389/fpsyg.2021.763046> PMID: 34887812
20. Logan NE, Ward-Ritacco CL. The developing brain: considering the multifactorial effects of obesity, physical activity & mental wellbeing in childhood and adolescence. *Children (Basel)*. 2022;9(12):1802. <https://doi.org/10.3390/children9121802> PMID: 36553249
21. Deci EL, Ryan RM. Self-determination theory. *Handbook of theories of social psychology*. 2012. pp. 416–36.
22. Xi J, Sang B. A review of psychological resilience research. *J Health Psychol*. 2002;10:314–7.
23. Qiu W, Huang C, Xiao H, Nie Y, Ma W, Zhou F, et al. The correlation between physical activity and psychological resilience in young students: a systematic review and meta-analysis. *Front Psychol*. 2025;16:1557347. <https://doi.org/10.3389/fpsyg.2025.1557347> PMID: 40365624
24. Qiu W, Wang X, Cui H, Ma W, Xiao H, Qu G, et al. The impact of physical exercise on college students' physical self-efficacy: the mediating role of psychological resilience. *Behav Sci*. 2025;15(4):541. <https://doi.org/10.3390/bs15040541>
25. Yao S-J, Ma Q-S, Liu C, Cao D-W, Lyu T, Guo K-L. The relationship between physical exercise and subjective well-being among Chinese junior high school students: A chain mediating model. *Front Psychol*. 2023;13:1053252. <https://doi.org/10.3389/fpsyg.2022.1053252> PMID: 36698574
26. Bandura A. Self-efficacy mechanism in human agency. *Am Psychol*. 1982;37(2):122–47. <https://doi.org/10.1037/0003-066x.37.2.122>
27. An D, Pan J, Ran F, Bai D, Zhang J. Effects of physical exercise input on the exercise adherence of college students: the chain mediating role of sports emotional intelligence and exercise self-efficacy. *J Intell*. 2024;12(10):94. <https://doi.org/10.3390/jintelligence12100094> PMID: 39452511
28. Peng B, Chen W, Wang H, Yu T. How does physical exercise influence self-efficacy in adolescents? A study based on the mediating role of psychological resilience. *BMC Psychol*. 2025;13(1). <https://doi.org/10.1186/s40359-025-02529-y>
29. Zhao YH. The effect of physical exercise on college students' mental health and general self-efficacy. *Revista de Psicologia del Deporte*. 2021;30(4):167–74.
30. van Zyl Y, Dhurup M. Self-efficacy and its relationship with satisfaction with life and happiness among university students. *J Psychol Afr*. 2018;28(5):389–93. <https://doi.org/10.1080/14330237.2018.1528760>
31. Ekinci N, Koç H. Grit, general self-efficacy, and life satisfaction: The mediating role of hope. *J Commun Psychol*. 2022;51(3):1288–99. <https://doi.org/10.1002/jcop.22962>
32. Tian H, Zhou W, Qiu Y, Zou Z. The role of recreation specialization and self-efficacy on life satisfaction: the mediating effect of flow experience. *Int J Environ Res Public Health*. 2022;19(6):3243. <https://doi.org/10.3390/ijerph19063243> PMID: 35328931
33. Garber CE. The health benefits of exercise in overweight and obese patients. *Curr Sports Med Rep*. 2019;18(8):287–91. <https://doi.org/10.1249/JSR.0000000000000619> PMID: 31389870
34. Xu P, Huang Y, Hou Q, Cheng J, Ren Z, Ye R, et al. Relationship between physical activity and mental health in a national representative cross-section study: Its variations according to obesity and comorbidity. *J Affect Disord*. 2022;308:484–93. <https://doi.org/10.1016/j.jad.2022.04.037> PMID: 35439463
35. Guo Y, Qin K, Yu Y, Wang L, Xu F, Zheng Q, et al. Physical exercise can enhance meaning in life of college students: the chain mediating role of self-efficacy and life satisfaction. *Front Psychol*. 2024;14. <https://doi.org/10.3389/fpsyg.2023.1306257>
36. Bandura A. Self-efficacy: toward a unifying theory of behavioral change. *Psychol Rev*. 1977;84(2):191–215. <https://doi.org/10.1037//0033-295x.84.2.191> PMID: 847061
37. Sabouripour F, Roslan S, Ghiami Z, Memon MA. Mediating role of self-efficacy in the relationship between optimism, psychological well-being, and resilience among Iranian students. *Front Psychol*. 2021;12:675645. <https://doi.org/10.3389/fpsyg.2021.675645> PMID: 34194372
38. Yi R, Zhou Z, Ma W, Yang C, Wang F, Wu J. Mediating role of psychological resilience in the relationship between self-efficacy and professional identity among nurses. *Biotechnol Genetic Eng Rev*. 2023;40(2):726–38. <https://doi.org/10.1080/02648725.2023.2190943>
39. Li X, Wang J, Yu H, Liu Y, Xu X, Lin J, et al. How does physical activity improve adolescent resilience? Serial indirect effects via self-efficacy and basic psychological needs. *PeerJ*. 2024;12:e17059. <https://doi.org/10.7717/peerj.17059>
40. Cohen S, Kamarck T, Mermelstein R. A global measure of perceived stress. *J Health Soc Behav*. 1983;24(4):385–96. <https://doi.org/10.2307/2136404> PMID: 6668417



41. Zhai X, Wu N, Koriyama S, Wang C, Shi M, Huang T, et al. Mediating effect of perceived stress on the association between physical activity and sleep quality among Chinese college students. *Int J Environ Res Public Health*. 2021;18(1):289. <https://doi.org/10.3390/ijerph18010289> PMID: [33401720](https://pubmed.ncbi.nlm.nih.gov/33401720/)
42. Meyer S, Grob A, Gerber M. No fun, no gain: The stress-buffering effect of physical activity on life satisfaction depends on adolescents' intrinsic motivation. *Psychol Sport Exerc*. 2021;56:102004. <https://doi.org/10.1016/j.psychsport.2021.102004>
43. Olefir V, Kuznetsov M, Plokhikh V. Effect of physical exercises and perceived stress interaction on students' satisfaction with life. *Pedagogics, psychology, medical-biological problems of physical training and sports*. 2019;2019(1):30–5.
44. Richardson N. The effects of physical activity on perceived stress, anxiety and life satisfaction. 2014.
45. Zaheer Z, Khan M. Perceived stress, resilience and psychological well-being among university students: the role of optimism as a mediator. *Asian Soc Stud Appl Res*. 2022;3(1):55–67.
46. Lara-Cabrera ML, Betancort M, Muñoz-Rubilar CA, Rodríguez Novo N, De Las Cuevas C. The mediating role of resilience in the relationship between perceived stress and mental health. *Int J Environ Res Public Health*. 2021;18(18):9762. <https://doi.org/10.3390/ijerph18189762> PMID: [34574684](https://pubmed.ncbi.nlm.nih.gov/34574684/)
47. Lines RLJ, Ducker KJ, Ntoumanis N, Thøgersen-Ntoumani C, Fletcher D, Gucciardi DF. Stress, physical activity, sedentary behavior, and resilience—the effects of naturalistic periods of elevated stress: a measurement-burst study. *Psychophysiology*. 2021;58(8):e13846. <https://doi.org/10.1111/psyp.13846> PMID: [34124785](https://pubmed.ncbi.nlm.nih.gov/34124785/)
48. Kline RB. Response to Leslie Hayduk's Review of Principles and Practice of Structural Equation Modeling. *Canad Stud Popul*. 2018;45(3–4):188. <https://doi.org/10.25336/csp29418>
49. Zhang R. Raw Data\_Impact of Physical Activity on Life Satisfaction and Psychological Resilience Among College Students. Figshare; 2025. <https://doi.org/10.6084/m9.figshare.29528375>
50. Marsh HW, Richards GE, Johnson S, Roche L, Tremayne P. Physical self-description questionnaire: psychometric properties and a multitrait-multimethod analysis of relations to existing instruments. *J Sport Exerc Psychol*. 1994;16(3):270–305. <https://doi.org/10.1123/jsep.16.3.270>
51. Diener E, Emmons RA, Larsen RJ, Griffin S. The satisfaction with life scale. *J Pers Assess*. 1985;49(1):71–5. [https://doi.org/10.1207/s15327752jpa4901\\_13](https://doi.org/10.1207/s15327752jpa4901_13) PMID: [16367493](https://pubmed.ncbi.nlm.nih.gov/16367493/)
52. Yu XN, Zhang JX. Self resilience scale and Connor - Davidson resilience scale application. *Psychol Sci*. 2007.
53. Lu L, Ye C, Xu R, Feng H, Liu B. Psychological resilience and perceived stress among Chinese medical students: mediation between optimistic intelligence quotient and adversity quotient. *BMC Med Educ*. 2024;24(1):1358. <https://doi.org/10.1186/s12909-024-06287-0> PMID: [39587588](https://pubmed.ncbi.nlm.nih.gov/39587588/)
54. Schwarzer R, Jerusalem M, Weinman J, Wright S, Johnston M. Measures in health psychology: A user's portfolio. Causal and control beliefs. *Causal Control Beliefs*. 1995;1(011):35–7.
55. Liu X, Li Y, Cao X. Bidirectional reduction effects of perceived stress and general self-efficacy among college students: a cross-lagged study. *Humanit Soc Sci Commun*. 2024;11(1). <https://doi.org/10.1057/s41599-024-02785-0>
56. Lu W, Bian Q, Wang W, Wu X, Wang Z, Zhao M. Chinese version of the Perceived Stress Scale-10: a psychometric study in Chinese university students. *PLoS One*. 2017;12(12):e0189543. <https://doi.org/10.1371/journal.pone.0189543> PMID: [29252989](https://pubmed.ncbi.nlm.nih.gov/29252989/)
57. Podsakoff PM, MacKenzie SB, Lee J-Y, Podsakoff NP. Common method biases in behavioral research: a critical review of the literature and recommended remedies. *J Appl Psychol*. 2003;88(5):879–903. <https://doi.org/10.1037/0021-9010.88.5.879> PMID: [14516251](https://pubmed.ncbi.nlm.nih.gov/14516251/)
58. Podsakoff PM, MacKenzie SB, Lee J-Y, Podsakoff NP. Common method biases in behavioral research: a critical review of the literature and recommended remedies. *J Appl Psychol*. 2003;88(5):879–903. <https://doi.org/10.1037/0021-9010.88.5.879> PMID: [14516251](https://pubmed.ncbi.nlm.nih.gov/14516251/)
59. Su JL, Wu Z, Su YJ. Physical Exercise Predicts Social Competence and General Well-Being in Chinese Children 10 to 15Years Old: a Preliminary Study. *Child Indic Res*. 2018;11(6):1935–49. <https://doi.org/10.1007/s12187-017-9523-2>
60. Jetzke M, Mutz M. Sport for pleasure, fitness, medals or slenderness? Differential effects of sports activities on well-being. *Appl Res Qual Life*. 2019;15(5):1519–34. <https://doi.org/10.1007/s11482-019-09753-w>
61. Kan B, Xie Y. Impact of sports participation on life satisfaction among internal migrants in China: The chain mediating effect of social interaction and self-efficacy. *Acta Psychologica*. 2024;243:104139. <https://doi.org/10.1016/j.actpsy.2024.104139>
62. Fu H-Y, Wang J, Hu J-X. Influence of physical education on anxiety, depression, and self-esteem among college students. *World J Psychiatry*. 2023;13(12):1121–32. <https://doi.org/10.5498/wjp.v13.i12.1121> PMID: [38186731](https://pubmed.ncbi.nlm.nih.gov/38186731/)
63. Fergus S, Zimmerman MA. Adolescent resilience: a framework for understanding healthy development in the face of risk. *Annu Rev Public Health*. 2005;26:399–419. <https://doi.org/10.1146/annurev.publhealth.26.021304.144357> PMID: [15760295](https://pubmed.ncbi.nlm.nih.gov/15760295/)
64. Li X, Liu Y, Rong F, Wang R, Li L, Wei R, et al. Physical activity and social anxiety symptoms among Chinese college students: a serial mediation model of psychological resilience and sleep problems. *BMC Psychol*. 2024;12(1):440. <https://doi.org/10.1186/s40359-024-01937-w> PMID: [39138553](https://pubmed.ncbi.nlm.nih.gov/39138553/)
65. Li B. The relationship between physical exercise and self-efficacy of college students and the mediating role of emotional self-regulation. *Revista de Psicologia del Deporte*. 2023;32(1):241–9.
66. Midkiff MF, Lindsey CR, Meadows EA. The role of coping self-efficacy in emotion regulation and frequency of NSSI in young adult college students. *Cogent Psychol*. 2018;5(1):1520437. <https://doi.org/10.1080/23311908.2018.1520437>

67. Hogue CM, Fry MD, Iwasaki S. The impact of the perceived motivational climate in physical education classes on adolescent greater life stress, coping appraisals, and experience of shame. *Sport Exerc Perform Psychol.* 2019;8(3):273–89. <https://doi.org/10.1037/spy0000153>
68. Liu M, Li X, He Z. Self-control mediates, and mobile phone dependence moderates, the relationship between psychological capital and attitudes toward physical exercise among Chinese university students. *Front Psychol.* 2022;13:888175. <https://doi.org/10.3389/fpsyg.2022.888175> PMID: [35707658](https://pubmed.ncbi.nlm.nih.gov/35707658/)
